# Supplementary material
Source: PubMed Central journal article supplement (PMC2916466)
Supplement: supp_76_15_5079__1.pdf [file supp_76_15_5079__1.pdf]

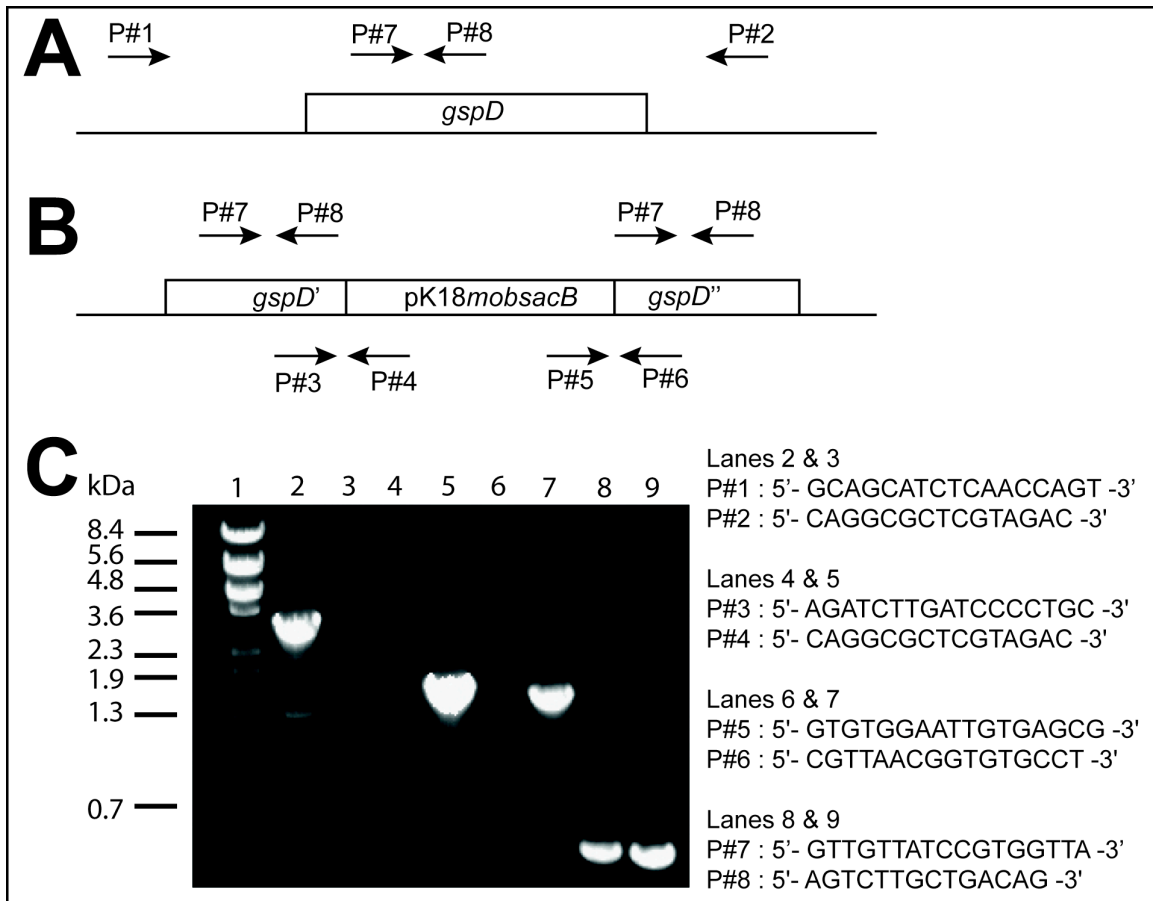

**Figure S1. Confirmation of the *C. japonicus gspD::pJGG1* insertion mutation.** A liquid culture of wild type and the candidate *gspD::pJGG1* insertion were used as template for amplification via PCR. The amplification products were then fractionated by agarose gel electrophoresis and the DNA detected by staining with ethidium bromide as described in "Materials and Methods". **Panel A & B.** Map of wild type and *gspD::pJGG1* insertion, with locations of primers used for PCR. "P#1-P#8" refer to the primer number used for amplification (the sequences of which are shown above). **Panel C.** Agarose gel electrophoresis of PCR amplified DNA. **Lane 1**,  $\lambda$  BstEII standard; **Lane 2**, PCR amplification of *gspD* region from wild type *C. japonicus* with primers P#1 and P#2; **Lane 3**, PCR of *gspD* region from *gspD::pJGG1* mutant with primers P#1 and P#2; **Lane 4**, PCR from wild type *C. japonicus* with primers P#3 and P#4; **Lane 5**, PCR from the *gspD::pJGG1* mutant with primers P#3 and P#4; **Lane 6**, PCR from wild type *C. japonicus* with primers P#5 and P#6; **Lane 7**, PCR from the *gspD::pJGG1* mutant with primers P#5 and P#6; **Lane 8**, PCR of internal *gspD* region from wild type *C. japonicus* with primers P#7 and P#8; **Lane 9**, PCR of internal *gspD* region from the *gspD::pJGG1* mutant with primers P#7 and P#8.
